# Supplementary material
Source: PubMed Central journal article supplement (PMC3020114)
Supplement: emboj2010290s2.pdf [file emboj2010290s2.pdf]

Manuscript EMBO-2010-74513

## **Novel role and mechanism of protein inhibitor of activated STAT1 in spatial learning**

Derek J.C. Tai, Wei L. Hsu, Yen C. Liu, Yun L. Ma and Eminy H.Y.Lee

*Corresponding author: Eminy Lee, Institute of Biomedical Sciences, Academia Sinica*

---

### **Review timeline:**

Submission date:

15 April 2010

Accepted:

27 October 2010

---

### **Transaction Report:**

(Note: With the exception of the correction of typographical or spelling errors that could be a source of ambiguity, letters and reports are not edited. The original formatting of letters and referee reports may not be reflected in this compilation.)

No Peer Review Process File is available with this article, as the authors have chosen not to make the review process public in this case.
